# Supplementary material for: Role of Splicing Regulatory Elements and In Silico Tools Usage in the Identification of Deep Intronic Splicing Variants in Hereditary Breast/Ovarian Cancer Genes
Source: MDPI journal article supplement (doi:10.3390/cancers13133341), 2021-07-03
Supplement: s1 [file s1]

# Supplementary Materials: Role of Splicing Regulatory Elements and In Silico Tools Usage in the Identification of Deep Intronic Splicing Variants in Hereditary Breast/Ovarian Cancer Genes

Alejandro Moles-Fernández, Joanna Domènech-Vivó, Anna Tenés, Judith Balmaña, Orland Diez and Sara Gutiérrez-Enríquez

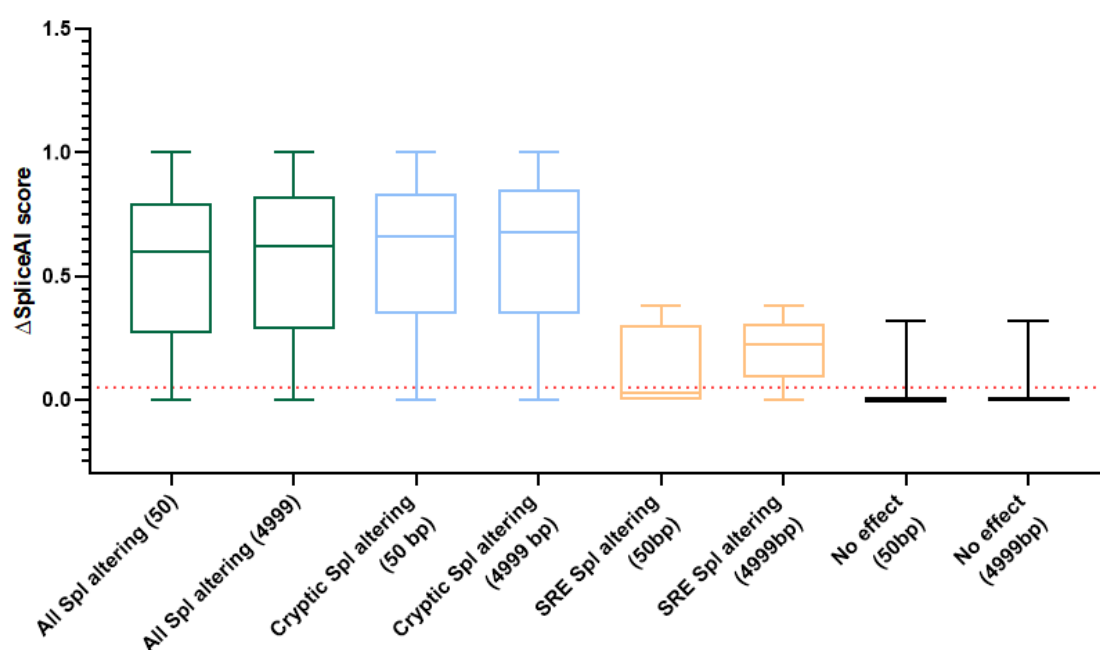

**Figure S1.**  $\Delta$ SpliceAI scores of spliceogenic and not spliceogenic variants collected in the literature database, taking predictions of cryptic sites in a window of 50bp or 4999bp. In the analysis with the 16 splicing altering variants by affecting SREs, the  $\Delta$ SpliceAI evaluation of the 4999 bp located on each side of the variant reached higher predictive power in comparison with a 50 bp window analysis. Red line indicates a 0.05 score cut-off, and a mean  $\pm$  standard deviation are represented in each boxplot graph.

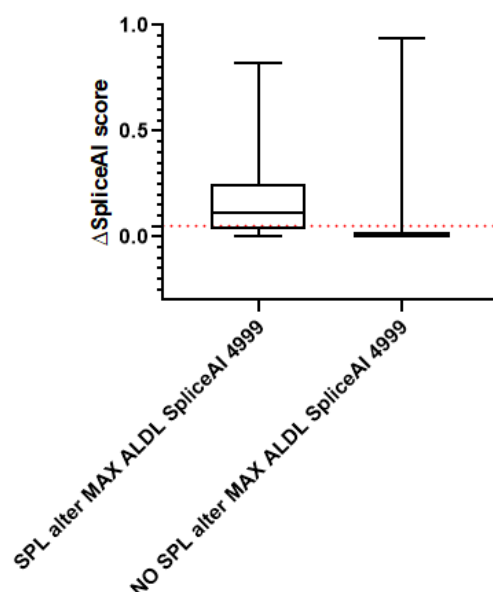

**Figure S2.** Comparison of  $\Delta$ SpliceAI scores between spliceogenic and not spliceogenic exonic variants collected from Tubeuf et al., 2020.  $\Delta$ SpliceAI values of the 4999 bp located on each side of the variant in spliceogenic ones reach higher scores comparing with not spliceogenic variants. Red line indicates a 0.06 score cut-off, and a mean  $\pm$  standard deviation are represented in each boxplot graph. MAX ALDL, maximum value of Acceptor Loss and Donor Loss of SpliceAI.

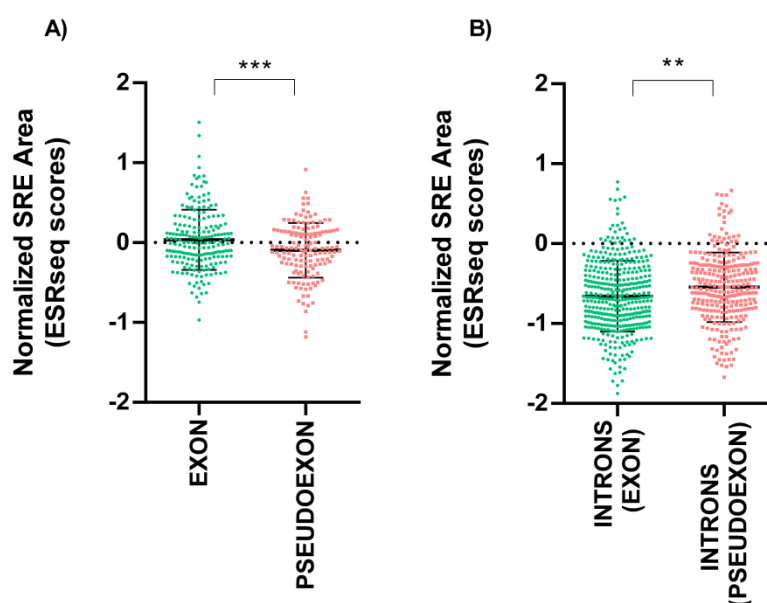

**Figure S3.** Comparison of SREs abundance in different genomic regions, using the Normalized SRE Area calculated using ESRseq scores. **(A)** Differences in the normalized area ESRseq scores of regulatory elements between canonical exons and pseudoexons. A greater abundance of positive ESRseq values was observed in canonical exons (*t*-test, \*\*\**p*-value < 0.001). **(B)** Differences in the normalized area ESRseq scores of regulatory elements between introns adjacent to canonical exons and pseudoexons. A mean was calculated with the two values of normalised area SRE of the acceptor or donor flanking intronic regions of each exon/pseudoexon. A greater abundance of negative ESRseq values was observed in introns adjacent to canonical exons (*t*-test, \*\**p*-value  $\leq$  0.01). Mean  $\pm$  standard deviation is represented in each graph.
